# Supplementary material for: Identifying the Barriers to Universal Cervical Length Screening for Preterm Birth Prevention at a Tertiary Hospital in Thailand (Physician Perspectives): Implementation Research
Source: MDPI journal article supplement (doi:10.3390/healthcare11071039), 2023-04-04
Supplement: s1 [file s1]

**Table S1. Context evaluation of tertiary hospitals (more than one option able to be selected)**

| Relevant content                                                                                                                                                                                                                                                                                                                                                                                                                                                                                                                           | Number (%)<br>(n = 120)                                                                                                                                                   | 95% Confidence interval                                                                                                                                                              |
|--------------------------------------------------------------------------------------------------------------------------------------------------------------------------------------------------------------------------------------------------------------------------------------------------------------------------------------------------------------------------------------------------------------------------------------------------------------------------------------------------------------------------------------------|---------------------------------------------------------------------------------------------------------------------------------------------------------------------------|--------------------------------------------------------------------------------------------------------------------------------------------------------------------------------------|
| Concrete hospital policy for cervical length screening to prevent preterm births:<br><ul style="list-style-type: none"> <li>There is a specific operating policy</li> <li>Screening is done in parallel with other duties (e.g., teaching; research; etc.)</li> <li>No policy</li> </ul>                                                                                                                                                                                                                                                   | <ul style="list-style-type: none"> <li>55 (45.8%)</li> <li>32 (26.7%)</li> <li>33 (27.5%)</li> </ul>                                                                      | <ul style="list-style-type: none"> <li>37.2% to 54.7%</li> <li>19.6% to 35.2%</li> <li>20.3% to 36.1%</li> </ul>                                                                     |
| Working group or committee in place to implement preterm birth prevention:<br><ul style="list-style-type: none"> <li>Working group established</li> <li>Only some personnel are assigned</li> <li>No assignment</li> </ul>                                                                                                                                                                                                                                                                                                                 | <ul style="list-style-type: none"> <li>31 (25.8%)</li> <li>52 (43.3%)</li> <li>37 (30.9%)</li> </ul>                                                                      | <ul style="list-style-type: none"> <li>18.8% to 34.3%</li> <li>34.8% to 52.3%</li> <li>23.3% to 39.6%</li> </ul>                                                                     |
| Action plan to prevent preterm births in the hospital:<br><ul style="list-style-type: none"> <li>Yes</li> <li>No</li> </ul>                                                                                                                                                                                                                                                                                                                                                                                                                | <ul style="list-style-type: none"> <li>108 (90.0%)</li> <li>12 (10.0%)</li> </ul>                                                                                         | <ul style="list-style-type: none"> <li>83.3% to 94.2%</li> <li>5.8% to 16.7%</li> </ul>                                                                                              |
| If action plan is established (n = 108/120):<br><ul style="list-style-type: none"> <li>There is a monthly/quarterly/yearly operational planning meeting</li> <li>There is a meeting to report performance monthly/quarter/yearly</li> <li>A meeting or an activity is held occasionally</li> </ul>                                                                                                                                                                                                                                         | <ul style="list-style-type: none"> <li>54/108 (50.0%)</li> <li>58/108 (53.7%)</li> <li>27/108 (25.0%)</li> </ul>                                                          | <ul style="list-style-type: none"> <li>40.7% to 59.3%</li> <li>44.3% to 62.8%</li> <li>17.8% to 33.9%</li> </ul>                                                                     |
| Have a role as a working physician in formulating policies relating to preterm birth prevention:<br><ul style="list-style-type: none"> <li>Yes</li> <li>No</li> </ul>                                                                                                                                                                                                                                                                                                                                                                      | <ul style="list-style-type: none"> <li>99 (82.5%)</li> <li>21 (17.5%)</li> </ul>                                                                                          | <ul style="list-style-type: none"> <li>74.7% to 88.3%</li> <li>11.7% to 25.3%</li> </ul>                                                                                             |
| Encouragement is given by the Maternal and Child Health Board for the conduct of a cervical length screening program at the hospital:<br><ul style="list-style-type: none"> <li>No</li> <li>Yes</li> </ul>                                                                                                                                                                                                                                                                                                                                 | <ul style="list-style-type: none"> <li>42 (35.0%)</li> <li>78 (65.0%)</li> </ul>                                                                                          | <ul style="list-style-type: none"> <li>27.1% to 43.9%</li> <li>56.1% to 73.0%</li> </ul>                                                                                             |
| Support is provided by the Maternal and Child Health Board for the implementation of a program of preterm birth prevention (n = 78/120):<br><ul style="list-style-type: none"> <li>Micronized Progesterone vaginal soft-gel capsules (Utrogestan)</li> <li>Progesterone pessaries (Cyclogest)</li> <li>17-OHPC (Proluton Depot)</li> <li>Funding for training of medical personnel in cervical length measurement</li> <li>Funding for the purchase of ultrasound equipment</li> <li>Other</li> </ul>                                      | <ul style="list-style-type: none"> <li>46/78 (59.0%)</li> <li>0 (0%)</li> <li>37/78 (47.4%)</li> <li>19/78 (24.4%)</li> <li>14/78 (17.9%)</li> <li>2/78 (2.6%)</li> </ul> | <ul style="list-style-type: none"> <li>47.9% to 69.2%</li> <li>0.0% to 4.7%</li> <li>36.7% to 58.4%</li> <li>16.2% to 34.9%</li> <li>11.0% to 27.9%</li> <li>0.7% to 8.9%</li> </ul> |
| Perception of the current role of the Maternal and Child Health Board in a cervical length screening program to prevent preterm births:<br><ul style="list-style-type: none"> <li>No role at all</li> <li>Limited role</li> <li>Very active</li> </ul>                                                                                                                                                                                                                                                                                     | <ul style="list-style-type: none"> <li>24 (20.0%)</li> <li>59 (49.2%)</li> <li>37 (30.8%)</li> </ul>                                                                      | <ul style="list-style-type: none"> <li>13.8% to 28.0%</li> <li>40.4% to 58.0%</li> <li>23.3% to 39.6%</li> </ul>                                                                     |
| Roles of the Maternal and Child Health Board that you would like to see or receive:<br><ul style="list-style-type: none"> <li>Act as a policy maker and provide the main operation plans so that all hospitals operate in the same way and their performances can be compared</li> <li>Be the leader or individual responsible for an academic training program of cervical length screening for staff at a district hospital</li> <li>Responsible for providing medicines and medical supplies to all hospitals</li> <li>Other</li> </ul> | <ul style="list-style-type: none"> <li>32 (80.0%)</li> <li>24 (20.0%)</li> <li>59 (49.2%)</li> <li>37 (30.8%)</li> </ul>                                                  | <ul style="list-style-type: none"> <li>65.2% to 89.5%</li> <li>13.8% to 28.0%</li> <li>40.4% to 58.0%</li> <li>23.3% to 39.6%</li> </ul>                                             |

**Table S2. Availability of resources**

| Resources                                                                                                                                                                                     | Number (%)<br>(n = 120)                                                                            | 95% Confidence<br>interval                                                                                     |
|-----------------------------------------------------------------------------------------------------------------------------------------------------------------------------------------------|----------------------------------------------------------------------------------------------------|----------------------------------------------------------------------------------------------------------------|
| Hospital regularly employs an adequate number of obstetricians to meet workloads:<br><ul style="list-style-type: none"> <li>No</li> <li>Yes</li> </ul>                                        | <ul style="list-style-type: none"> <li>44 (36.7%)</li> <li>76 (63.3%)</li> </ul>                   | <ul style="list-style-type: none"> <li>28.6% to 45.6%</li> <li>54.4% to 71.4%</li> </ul>                       |
| Hospital has obstetricians who can accurately perform cervical length measurements:<br><ul style="list-style-type: none"> <li>No</li> <li>Yes, but not enough</li> <li>Yes, enough</li> </ul> | <ul style="list-style-type: none"> <li>3 (2.5%)</li> <li>57 (47.5%)</li> <li>60 (50.0%)</li> </ul> | <ul style="list-style-type: none"> <li>0.9% to 7.1%</li> <li>38.8% to 56.4%</li> <li>41.2% to 58.8%</li> </ul> |
| Hospital has a person responsible for providing information on a preterm birth prevention program (Project Manager):<br><ul style="list-style-type: none"> <li>Yes</li> <li>No</li> </ul>     | <ul style="list-style-type: none"> <li>62 (51.7%)</li> <li>58 (48.3%)</li> </ul>                   | <ul style="list-style-type: none"> <li>42.8% to 60.4%</li> <li>39.6% to 57.2%</li> </ul>                       |
| Hospital has a specific budget for cervical length measurement screening:<br><ul style="list-style-type: none"> <li>Yes (funds are sourced from the district budget)</li> <li>No</li> </ul>   | <ul style="list-style-type: none"> <li>13 (10.8%)</li> <li>107 (89.2%)</li> </ul>                  | <ul style="list-style-type: none"> <li>6.4% to 17.7%</li> <li>82.3% to 93.6%</li> </ul>                        |
| Hospital has enough ultrasound machines that can be used for routine tasks:<br><ul style="list-style-type: none"> <li>Not enough</li> <li>Enough</li> </ul>                                   | <ul style="list-style-type: none"> <li>44 (36.7%)</li> <li>76 (63.3%)</li> </ul>                   | <ul style="list-style-type: none"> <li>28.6% to 45.6%</li> <li>54.4% to 71.4%</li> </ul>                       |
| Hospital has an ultrasound machine that can be used specifically for a cervical length measurement screening program:<br><ul style="list-style-type: none"> <li>No</li> <li>Yes</li> </ul>    | <ul style="list-style-type: none"> <li>59 (49.2%)</li> <li>61 (50.8%)</li> </ul>                   | <ul style="list-style-type: none"> <li>40.4% to 58.0%</li> <li>42.0% to 59.6%</li> </ul>                       |

**Table S3. Impact of preterm births on hospitals, pregnant women, and families**

| Hospital aspect                                                                                                                                     | Number (%)<br>(n = 120)                                                                             | 95% Confidence<br>interval                                                                                      |
|-----------------------------------------------------------------------------------------------------------------------------------------------------|-----------------------------------------------------------------------------------------------------|-----------------------------------------------------------------------------------------------------------------|
| Workload of the personnel involved:<br><ul style="list-style-type: none"> <li>No effect</li> <li>Little effect</li> <li>Heavy effect</li> </ul>     | <ul style="list-style-type: none"> <li>2 (1.7%)</li> <li>22 (18.3%)</li> <li>96 (80.0%)</li> </ul>  | <ul style="list-style-type: none"> <li>0.5% to 5.9%</li> <li>12.4% to 26.2%</li> <li>72.0% to 86.2%</li> </ul>  |
| Expenses that the hospital has to bear:<br><ul style="list-style-type: none"> <li>No effect</li> <li>Little effect</li> <li>Heavy effect</li> </ul> | <ul style="list-style-type: none"> <li>3 (2.5%)</li> <li>16 (13.3%)</li> <li>101 (84.2%)</li> </ul> | <ul style="list-style-type: none"> <li>0.9% to 7.1%</li> <li>8.4% to 20.6%</li> <li>76.6% to 89.6%</li> </ul>   |
| Length of hospital stays:<br><ul style="list-style-type: none"> <li>No effect</li> <li>Little effect</li> <li>Heavy effect</li> </ul>               | <ul style="list-style-type: none"> <li>7 (5.8%)</li> <li>20 (16.7%)</li> <li>93 (77.5%)</li> </ul>  | <ul style="list-style-type: none"> <li>2.9% to 11.6%</li> <li>11.1% to 24.4%</li> <li>69.2% to 84.1%</li> </ul> |
| <b>Pregnant women and family aspects</b>                                                                                                            |                                                                                                     |                                                                                                                 |

|                                                                                                                                                                      |                                                                                                    |                                                                                                                |
|----------------------------------------------------------------------------------------------------------------------------------------------------------------------|----------------------------------------------------------------------------------------------------|----------------------------------------------------------------------------------------------------------------|
| <b>Family expenses:</b> <ul style="list-style-type: none"> <li>No effect</li> <li>Little effect</li> <li>Heavy effect</li> </ul>                                     | <ul style="list-style-type: none"> <li>2 (1.7%)</li> <li>22 (18.3%)</li> <li>96 (80.0%)</li> </ul> | <ul style="list-style-type: none"> <li>0.5% to 5.9%</li> <li>12.4% to 26.2%</li> <li>72.0% to 86.2%</li> </ul> |
| <b>Problems with caring for the newborn:</b> <ul style="list-style-type: none"> <li>No effect</li> <li>Little effect</li> <li>Heavy effect</li> </ul>                | <ul style="list-style-type: none"> <li>1 (0.8%)</li> <li>8 (6.7%)</li> <li>111 (92.5%)</li> </ul>  | <ul style="list-style-type: none"> <li>0.2% to 4.6%</li> <li>3.4% to 12.6%</li> <li>86.4% to 96.0%</li> </ul>  |
| <b>Problems in the life and work of the family members:</b> <ul style="list-style-type: none"> <li>No effect</li> <li>Little effect</li> <li>Heavy effect</li> </ul> | <ul style="list-style-type: none"> <li>2 (1.7%)</li> <li>11 (9.2%)</li> <li>107 (89.2%)</li> </ul> | <ul style="list-style-type: none"> <li>0.5% to 5.9%</li> <li>5.2% to 15.7%</li> <li>82.3% to 93.6%</li> </ul>  |

**Table S4. Assessment of project inputs**

| <b>Input evaluation</b>                                                                                                                                                                                                                                                                                                                                                                                      | <b>Number (%)<br/>(n = 120)</b>                                                                             | <b>95% Confidence<br/>interval</b>                                                                              |
|--------------------------------------------------------------------------------------------------------------------------------------------------------------------------------------------------------------------------------------------------------------------------------------------------------------------------------------------------------------------------------------------------------------|-------------------------------------------------------------------------------------------------------------|-----------------------------------------------------------------------------------------------------------------|
| <b>Realization at the hospital that preterm births present problems:</b> <ul style="list-style-type: none"> <li>Yes</li> <li>No</li> </ul>                                                                                                                                                                                                                                                                   | <ul style="list-style-type: none"> <li>119 (99.2%)</li> <li>1 (0.8%)</li> </ul>                             | <ul style="list-style-type: none"> <li>95.4% to 99.9%</li> <li>0.2% to 4.6%</li> </ul>                          |
| <b>Overall degree of severity of the problems:</b> <ul style="list-style-type: none"> <li>Low</li> <li>Moderate</li> <li>High</li> </ul>                                                                                                                                                                                                                                                                     | <ul style="list-style-type: none"> <li>4 (3.4%)</li> <li>52 (43.7%)</li> <li>63 (52.9%)</li> </ul>          | <ul style="list-style-type: none"> <li>1.3% to 8.3%</li> <li>34.8% to 52.3%</li> <li>43.6% to 61.2%</li> </ul>  |
| <b>Physicians can perform cervical length measurements by vaginal ultrasound:</b> <ul style="list-style-type: none"> <li>Yes (with related certification)</li> <li>Yes (without related certification)</li> <li>No</li> </ul>                                                                                                                                                                                | <ul style="list-style-type: none"> <li>19 (15.8%)</li> <li>96 (80.0%)</li> <li>5 (4.2%)</li> </ul>          | <ul style="list-style-type: none"> <li>10.4% to 23.4%</li> <li>72.0% to 86.2%</li> <li>1.8% to 9.4%</li> </ul>  |
| <b>Usefulness of cervical length measurements to prevent preterm births (physicians' perspectives):</b> <ul style="list-style-type: none"> <li>Useless</li> <li>Somewhat useful</li> <li>Very useful</li> </ul>                                                                                                                                                                                              | <ul style="list-style-type: none"> <li>0 (0%)</li> <li>30 (25.0%)</li> <li>90 (75.0%)</li> </ul>            | <ul style="list-style-type: none"> <li>0.0% to 3.1%</li> <li>18.1% to 33.4%</li> <li>66.6% to 81.9%</li> </ul>  |
| <b>If cervical length measurements to prevent preterm births are deemed somewhat useful or useless (physicians' perspectives; n = 30/120):</b> <ul style="list-style-type: none"> <li>Perform cervical length measurements only in high-risk cases</li> <li>Use other screening tests; advise bed rest and drug usage</li> <li>Other</li> </ul>                                                              | <ul style="list-style-type: none"> <li>8/30 (26.6%)</li> <li>3/30 (10.0%)</li> <li>19/30 (63.4%)</li> </ul> | <ul style="list-style-type: none"> <li>14.2% to 44.5%</li> <li>3.5% to 25.6%</li> <li>45.5% to 78.1%</li> </ul> |
| <b>If cervical length measurements to prevent preterm births are deemed very useful (physicians' perspectives; n = 90/120):</b> <ul style="list-style-type: none"> <li>Establish a hospital policy to do as a stand-alone task</li> <li>Establish a hospital policy to do in conjunction with other screening tasks</li> <li>A hospital policy not required; screening can be performed as needed</li> </ul> | <ul style="list-style-type: none"> <li>40/90 (44.4%)</li> <li>46/90 (51.1%)</li> <li>5/90 (5.6%)</li> </ul> | <ul style="list-style-type: none"> <li>34.6% to 54.7%</li> <li>41.0% to 61.2%</li> <li>2.4% to 12.4%</li> </ul> |

|                                                                                                                                                                                                                                                                                                                                                                                                                                                                                                                                                                                                                                               |                                                                                                                                                                                                      |                                                                                                                                                                                                               |
|-----------------------------------------------------------------------------------------------------------------------------------------------------------------------------------------------------------------------------------------------------------------------------------------------------------------------------------------------------------------------------------------------------------------------------------------------------------------------------------------------------------------------------------------------------------------------------------------------------------------------------------------------|------------------------------------------------------------------------------------------------------------------------------------------------------------------------------------------------------|---------------------------------------------------------------------------------------------------------------------------------------------------------------------------------------------------------------|
| <b>Universal cervical length screening helps to reduce preterm births (n = 116/120):</b> <ul style="list-style-type: none"> <li>Agree; it would reduce the rate of preterm births</li> <li>Disagree; it would not affect the rate of preterm births</li> </ul>                                                                                                                                                                                                                                                                                                                                                                                | <ul style="list-style-type: none"> <li>76/116 (65.5%)</li> <li>40/116 (34.5%)</li> </ul>                                                                                                             | <ul style="list-style-type: none"> <li>56.5% to 73.5%</li> <li>26.5% to 43.5%</li> </ul>                                                                                                                      |
| <b>Awareness of the policy for universal cervical measurements for premature birth prevention included in the 2017 policy guidelines of the Ministry of Public Health:</b> <ul style="list-style-type: none"> <li>Aware</li> <li>Was not aware</li> </ul>                                                                                                                                                                                                                                                                                                                                                                                     | <ul style="list-style-type: none"> <li>88 (73.3%)</li> <li>32 (26.7%)</li> </ul>                                                                                                                     | <ul style="list-style-type: none"> <li>64.8% to 80.4%</li> <li>19.6% to 35.2%</li> </ul>                                                                                                                      |
| <b>If aware of the policy, level of agreement with the policy (n = 88/120):</b> <ul style="list-style-type: none"> <li>Agree</li> <li>Disagree</li> <li>Other</li> </ul>                                                                                                                                                                                                                                                                                                                                                                                                                                                                      | <ul style="list-style-type: none"> <li>55/88 (62.5%)</li> <li>20/88 (22.7%)</li> <li>13/88 (14.8%)</li> </ul>                                                                                        | <ul style="list-style-type: none"> <li>52.1% to 71.9%</li> <li>15.2% to 32.5%</li> <li>8.8% to 23.7%</li> </ul>                                                                                               |
| <b>A fee for ultrasound screening:</b> <ul style="list-style-type: none"> <li>Should not be charged to pregnant women</li> <li>Should be charged to pregnant women</li> </ul>                                                                                                                                                                                                                                                                                                                                                                                                                                                                 | <ul style="list-style-type: none"> <li>91 (75.8%)</li> <li>29 (24.2%)</li> </ul>                                                                                                                     | <ul style="list-style-type: none"> <li>67.5% to 82.6%</li> <li>17.4% to 32.6%</li> </ul>                                                                                                                      |
| <b>Willingness to work on a project to promote full implementation of universal cervical length screening:</b> <ul style="list-style-type: none"> <li>Not willing</li> <li>Willing</li> </ul>                                                                                                                                                                                                                                                                                                                                                                                                                                                 | <ul style="list-style-type: none"> <li>26 (21.7%)</li> <li>94 (78.3%)</li> </ul>                                                                                                                     | <ul style="list-style-type: none"> <li>15.2% to 29.9%</li> <li>70.2% to 84.8%</li> </ul>                                                                                                                      |
| <b>If not willing to work on the project (n = 26/120):</b> <ul style="list-style-type: none"> <li>Already have too much, or enough, full-time work</li> <li>Already have a substantial workload other than the regular job</li> <li>Do not think the preterm birth rate is such a severe problem that a program is needed</li> <li>Do not believe that cervical length screening plays a role in preventing preterm births</li> <li>Do not believe that cervical length screening to prevent preterm births is worth the requisite labor or funding</li> <li>Unsure of the accuracy of cervical length measurements</li> <li>Other</li> </ul> | <ul style="list-style-type: none"> <li>20/26 (76.9%)</li> <li>14/26 (53.8%)</li> <li>2/26 (7.7%)</li> <li>3/26 (11.5%)</li> <li>10/26 (38.5%)</li> <li>7/26 (26.9%)</li> <li>4/26 (15.4%)</li> </ul> | <ul style="list-style-type: none"> <li>58.0% to 89.0%</li> <li>35.5% to 71.2%</li> <li>2.1% to 24.1%</li> <li>4.0% to 29.0%</li> <li>22.4% to 57.5%</li> <li>13.7% to 46.1%</li> <li>6.2% to 33.5%</li> </ul> |

**Table S5. Process evaluation of universal cervical length screening program**

| Process evaluation                                                                                                                                                                                                                                                                                                                                                                                                                  | Number (%)<br>(n = 120)                                                                                                  | 95% Confidence<br>interval                                                                                      |
|-------------------------------------------------------------------------------------------------------------------------------------------------------------------------------------------------------------------------------------------------------------------------------------------------------------------------------------------------------------------------------------------------------------------------------------|--------------------------------------------------------------------------------------------------------------------------|-----------------------------------------------------------------------------------------------------------------|
| <b>With reference to the policy of the Ministry of Public Health for universal cervical length screening to prevent preterm births, the situation in the hospital is:</b> <ul style="list-style-type: none"> <li>Screening is performed for every case</li> <li>Screening is performed for high-risk cases only</li> <li>No screening tests are performed</li> </ul>                                                                | <ul style="list-style-type: none"> <li>29 (24.2%)</li> <li>73 (60.8%)</li> <li>18 (15.0%)</li> </ul>                     | <ul style="list-style-type: none"> <li>17.4% to 32.6%</li> <li>51.9% to 69.1%</li> <li>9.7% to 22.5%</li> </ul> |
| <b>With reference to hospital guidelines for the performance of cervical length screening to prevent preterm births:</b> <ul style="list-style-type: none"> <li>Hospital guidelines are systematic and clear</li> <li>The content of hospital guidelines is inadequate or unclear (e.g., because of an over-reliance on an unhelpful format, such as a flow chart)</li> <li>No hospital guidelines have been established</li> </ul> | <ul style="list-style-type: none"> <li>33 (27.5%)</li> <li>73 (60.8%)</li> <li>14 (11.7%)</li> </ul>                     | <ul style="list-style-type: none"> <li>20.3% to 36.1%</li> <li>51.9% to 69.1%</li> <li>7.1% to 18.6%</li> </ul> |
| <b>If systematic guidelines or documentation is provided by the hospital, the situation with the real practice of following those guidelines and documents is (n = 106):</b> <ul style="list-style-type: none"> <li>They are not observed</li> <li>Only some parts are observed, or they are observed in whole only occasionally</li> <li>They are strictly observed</li> </ul>                                                     | (n = 106) <ul style="list-style-type: none"> <li>1/106 (0.9%)</li> <li>79/106 (74.5%)</li> <li>26/106 (24.5%)</li> </ul> | <ul style="list-style-type: none"> <li>0.2% to 5.2%</li> <li>65.5% to 81.9%</li> <li>17.3% to 33.5%</li> </ul>  |

|                                                                                                                                                                                                                                                                                                                                                                                                                                                                                                                                                                     |                                                                                                                                                                                                    |                                                                                                                                                                                                                              |
|---------------------------------------------------------------------------------------------------------------------------------------------------------------------------------------------------------------------------------------------------------------------------------------------------------------------------------------------------------------------------------------------------------------------------------------------------------------------------------------------------------------------------------------------------------------------|----------------------------------------------------------------------------------------------------------------------------------------------------------------------------------------------------|------------------------------------------------------------------------------------------------------------------------------------------------------------------------------------------------------------------------------|
| <p>If systematic guidelines or documentation is provided by the hospital, specific workloads are set for each physician (n = 106):</p> <ul style="list-style-type: none"> <li>• Yes</li> <li>• No</li> </ul>                                                                                                                                                                                                                                                                                                                                                        | <p>(n = 106)</p> <ul style="list-style-type: none"> <li>• 49/106 (46.2%)</li> <li>• 57/106 (53.8%)</li> </ul>                                                                                      | <ul style="list-style-type: none"> <li>• 37.0% to 55.7%</li> <li>• 44.3% to 63.0%</li> </ul>                                                                                                                                 |
| <p>With reference to the broad policies of the Ministry of Public Health relating to the prevention of preterm births, the hospital has implemented those policies:</p> <ul style="list-style-type: none"> <li>• Yes, it has</li> <li>• No, it has not</li> </ul>                                                                                                                                                                                                                                                                                                   | <ul style="list-style-type: none"> <li>• 89 (74.2%)</li> <li>• 31 (25.8%)</li> </ul>                                                                                                               | <ul style="list-style-type: none"> <li>• 65.7% to 81.2%</li> <li>• 18.8% to 34.3%</li> </ul>                                                                                                                                 |
| <p>There are problems when screening is performed for the target group (pregnant women who are at risk):</p> <ul style="list-style-type: none"> <li>• No</li> <li>• Yes</li> </ul> <p>Problems encountered:</p> <ul style="list-style-type: none"> <li>▪ Long waiting times</li> <li>▪ Unsatisfactory service</li> <li>▪ Cost</li> <li>▪ Shyness/fear of examination/fear of pain</li> <li>▪ Other (e.g., the patient declined a transvaginal ultrasound; late antenatal care; unable to attend appointment; delays associated with patient-preparation)</li> </ul> | <ul style="list-style-type: none"> <li>• 46 (38.3%)</li> <li>• 74 (61.7%)</li> <li>▪ 54 (45.0%)</li> <li>▪ 12 (10.0%)</li> <li>▪ 24 (20.0%)</li> <li>▪ 40 (33.3%)</li> <li>▪ 14 (11.7%)</li> </ul> | <ul style="list-style-type: none"> <li>• 30.1% to 47.3%</li> <li>• 52.7% to 69.9%</li> <li>▪ 36.4% to 53.9%</li> <li>▪ 5.8% to 16.7%</li> <li>▪ 13.8% to 28.0%</li> <li>▪ 25.5% to 42.2%</li> <li>▪ 7.1% to 18.6%</li> </ul> |

**Table S6. Possible barriers to universal cervical length screening at hospitals**

| Possible barriers                                                                                                                                                                                                                                                                                                                                                                                                                                                                                                                                                                                                                                                                                                                                       | Number (%)<br>(n = 120)                                                                                                                                                                                              | 95% Confidence interval                                                                                                                                                                                                                               |
|---------------------------------------------------------------------------------------------------------------------------------------------------------------------------------------------------------------------------------------------------------------------------------------------------------------------------------------------------------------------------------------------------------------------------------------------------------------------------------------------------------------------------------------------------------------------------------------------------------------------------------------------------------------------------------------------------------------------------------------------------------|----------------------------------------------------------------------------------------------------------------------------------------------------------------------------------------------------------------------|-------------------------------------------------------------------------------------------------------------------------------------------------------------------------------------------------------------------------------------------------------|
| <p><b>Problems related to the physicians:</b></p> <ul style="list-style-type: none"> <li>• Insufficient number of doctors available to perform the procedure</li> <li>• Doctors have other urgent and necessary tasks</li> <li>• Doctors have excessive routine tasks</li> <li>• Doctors do not think that premature births are such a severe problem that the scheme is required</li> <li>• Doctors do not think that cervical length screening plays a role in preventing preterm births</li> <li>• Doctors do not believe that universal cervical length screening to prevent preterm births can justify the requisite labor and funding</li> <li>• Doctors are unsure about the correct procedures for the measurements</li> <li>• Other</li> </ul> | <ul style="list-style-type: none"> <li>• 51 (42.5%)</li> <li>• 63 (52.5%)</li> <li>• 78 (65.0%)</li> <li>• 4 (3.3%)</li> <li>• 28 (23.3%)</li> <li>• 37 (30.8%)</li> <li>• 50 (41.7%)</li> <li>• 9 (7.5%)</li> </ul> | <ul style="list-style-type: none"> <li>• 34.0% to 51.4%</li> <li>• 43.6% to 61.2%</li> <li>• 56.1% to 73.0%</li> <li>• 1.3% to 8.3%</li> <li>• 16.7% to 31.7%</li> <li>• 23.3% to 39.6%</li> <li>• 33.2% to 50.6%</li> <li>• 4.0% to 13.6%</li> </ul> |
| <p><b>Problems related to other personnel, such as nurses and administrative staff:</b></p> <ul style="list-style-type: none"> <li>• Insufficient number of personnel to support the performance of the procedure</li> <li>• There are other tasks that are more urgent</li> <li>• The staff already have an excessive volume of routine tasks to perform</li> <li>• Lack of confidence that the collecting, recording, and analyzing of the data by non-medical personnel will be accurate</li> <li>• Other</li> </ul>                                                                                                                                                                                                                                 | <ul style="list-style-type: none"> <li>• 75 (62.5%)</li> <li>• 38 (31.7%)</li> <li>• 72 (60.0%)</li> <li>• 51 (42.5%)</li> <li>• 2 (1.7%)</li> </ul>                                                                 | <ul style="list-style-type: none"> <li>• 53.6% to 70.7%</li> <li>• 24.0% to 40.5%</li> <li>• 51.1% to 68.3%</li> <li>• 34.0% to 51.4%</li> <li>• 0.5% to 5.9%</li> </ul>                                                                              |

|                                                                                                                                                                                                                                                                                                                                                          |                                                                                                                                  |                                                                                                                                                 |
|----------------------------------------------------------------------------------------------------------------------------------------------------------------------------------------------------------------------------------------------------------------------------------------------------------------------------------------------------------|----------------------------------------------------------------------------------------------------------------------------------|-------------------------------------------------------------------------------------------------------------------------------------------------|
| <b>Problems related to the hospital:</b> <ul style="list-style-type: none"> <li>• Hospital administrators ignore the issue</li> <li>• Lack of support for operating funds from government agencies</li> <li>• Lack of cost-free drug support (progesterone) for pregnant women with short cervixes to prevent preterm births</li> <li>• Other</li> </ul> | <ul style="list-style-type: none"> <li>• 21 (17.5%)</li> <li>• 67 (55.8%)</li> <li>• 62 (51.7%)</li> <li>• 14 (11.7%)</li> </ul> | <ul style="list-style-type: none"> <li>• 11.7% to 25.3%</li> <li>• 46.9% to 64.4%</li> <li>• 42.8% to 60.4%</li> <li>• 7.1% to 18.6%</li> </ul> |
|----------------------------------------------------------------------------------------------------------------------------------------------------------------------------------------------------------------------------------------------------------------------------------------------------------------------------------------------------------|----------------------------------------------------------------------------------------------------------------------------------|-------------------------------------------------------------------------------------------------------------------------------------------------|

**Table S7. Possible approaches to surmounting obstacles**

| Possible ways                                                                                                                                                                                                                                                                                                                                                                                                                                                                                                                                                                                                                                                                                                                                                                                                                                                             | Number (%)<br>(n = 120)                                                                                                                                                                                                                                                         | 95% Confidence<br>interval                                                                                                                                                                                                                                                                       |
|---------------------------------------------------------------------------------------------------------------------------------------------------------------------------------------------------------------------------------------------------------------------------------------------------------------------------------------------------------------------------------------------------------------------------------------------------------------------------------------------------------------------------------------------------------------------------------------------------------------------------------------------------------------------------------------------------------------------------------------------------------------------------------------------------------------------------------------------------------------------------|---------------------------------------------------------------------------------------------------------------------------------------------------------------------------------------------------------------------------------------------------------------------------------|--------------------------------------------------------------------------------------------------------------------------------------------------------------------------------------------------------------------------------------------------------------------------------------------------|
| <b>Relevant to physicians and/or related persons:</b> <ul style="list-style-type: none"> <li>• Add/request additional doctors who have the potential to screen cervical lengths using various methods</li> <li>• Provide regular training to physicians to enable them to confidently measure cervical lengths</li> <li>• Provide knowledge and skills relating to cervical length measurements for doctors who perform routine work so that they can become certificated and undertake examinations confidently</li> <li>• Provide reliable research results/demonstrations of the procedure/examples of screening results, and present doctors/nurses/other stakeholders with a detailed and convincing case for the cost-effectiveness of implementing universal cervical length screening</li> <li>• Reduce extraneous duties for doctors</li> <li>• Other</li> </ul> | <ul style="list-style-type: none"> <li>• 42 (35.0%)</li> <li>• 68 (56.7%)</li> <li>• 68 (56.7%)</li> <li>• 48 (40.0%)</li> <li>• 51 (42.5%)</li> <li>• 5 (4.2%)</li> </ul>                                                                                                      | <ul style="list-style-type: none"> <li>• 27.1% to 43.9%</li> <li>• 47.7% to 65.2%</li> <li>• 47.7% to 65.2%</li> <li>• 31.7% to 48.9%</li> <li>• 34.0% to 51.4%</li> <li>• 1.8% to 9.4%</li> </ul>                                                                                               |
| <b>Relevant to hospitals:</b> <ul style="list-style-type: none"> <li>• Provide hospitals with adequate and regular funding from relevant agencies</li> <li>• Extend screening to community hospitals to relieve workloads at tertiary centers</li> <li>• Educate patients about the benefits of cervical length measurements to prevent preterm births</li> <li>• Other (providing adequate ultrasound machines and, in high-risk cases, administering appropriate preventative medications)</li> </ul>                                                                                                                                                                                                                                                                                                                                                                   | <ul style="list-style-type: none"> <li>• 92 (76.7%)</li> <li>• 84 (70.0%)</li> <li>• 78 (65.0%)</li> <li>• 4 (3.3%)</li> </ul>                                                                                                                                                  | <ul style="list-style-type: none"> <li>• 68.3% to 83.3%</li> <li>• 61.3% to 77.5%</li> <li>• 56.1% to 73.0%</li> <li>• 1.3% to 8.3%</li> </ul>                                                                                                                                                   |
| <b>Monitoring of the systems related to, and evaluation of the results of, providing universal cervical length screening by the abovementioned approaches:</b> <ul style="list-style-type: none"> <li>• No aspects identified</li> <li>• Some aspects identified (n = 53) <ul style="list-style-type: none"> <li>▪ Objective</li> <li>▪ Monitoring system</li> <li>▪ Evaluation of screening results</li> <li>▪ Treatment evaluation</li> <li>▪ Assessment of the incidence of preterm births after project completion</li> </ul> </li> <li>• All aspects</li> </ul>                                                                                                                                                                                                                                                                                                      | <ul style="list-style-type: none"> <li>• 56 (46.7%)</li> <li>• 53 (44.2%) <ul style="list-style-type: none"> <li>▪ 27/53 (50.9%)</li> <li>▪ 9/53 (17.0%)</li> <li>▪ 16/53 (30.2%)</li> <li>▪ 15/53 (28.3%)</li> <li>▪ 15/53 (28.3%)</li> </ul> </li> <li>• 11 (9.2%)</li> </ul> | <ul style="list-style-type: none"> <li>• 38.0% to 55.6%</li> <li>• 35.6% to 53.1% <ul style="list-style-type: none"> <li>▪ 37.9% to 63.9%</li> <li>▪ 9.2% to 29.2%</li> <li>▪ 19.5% to 43.5%</li> <li>▪ 18.0% to 41.6%</li> <li>▪ 18.0% to 41.6%</li> </ul> </li> <li>• 5.2% to 15.7%</li> </ul> |
